# Supplementary material for: A general and feasible method for the fabrication of functional nanoparticles in mesoporous silica hollow composite spheres
Source: Royal Society of Chemistry journal article supplement (doi:10.1039/c2jm31138k), 2012-01-01
Supplement: c2jm31138k.pdf [file c2jm31138k.pdf]

Supporting information

## A General and Feasible Method for Fabrication of Functional Nanoparticles in Mesoporous Silica Hollow Composite Spheres

Yuyong Yin, Min Chen, Shuxue Zhou, Limin Wu\*

Department of Materials Science and State Key Laboratory of  
Molecular Engineering of Polymers, Advanced Materials  
Laboratory, Fudan University, Shanghai 200433, China

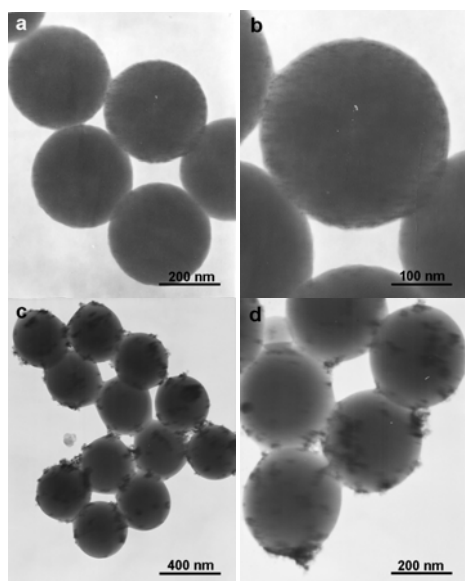

Figure S1. TEM images of (a, b) PS-Pt composite microspheres  
and (c, d) PS-Fe<sub>3</sub>O<sub>4</sub> composite microspheres.

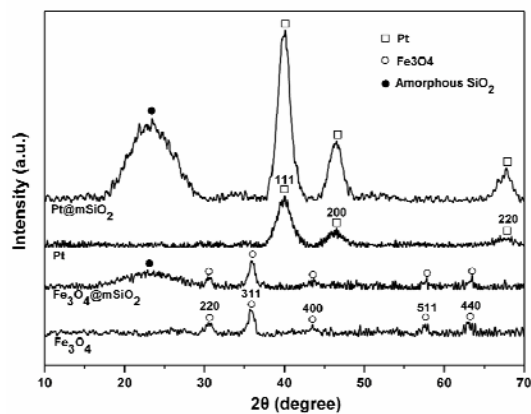

Figure S2. XRD patterns of Pt, Fe<sub>3</sub>O<sub>4</sub> nanoparticles and their  
HMNSs.

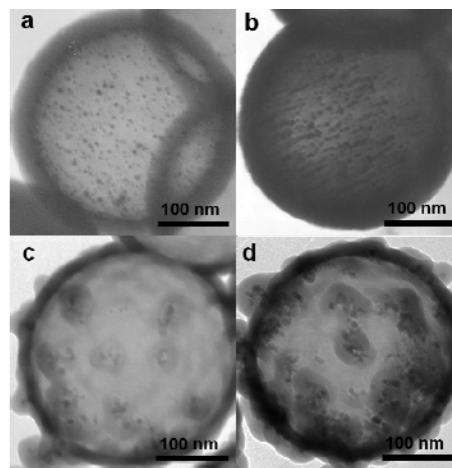

Figure S3. TEM images of Pt@SiO<sub>2</sub> HMNSs containing Pt NPs:  
(a) 2.3 wt%, (b) 4.6 wt%, and Fe<sub>3</sub>O<sub>4</sub>@SiO<sub>2</sub> HMNSs containing  
Fe<sub>3</sub>O<sub>4</sub> NPs: (c) 1 wt%, (d) 2 wt%.

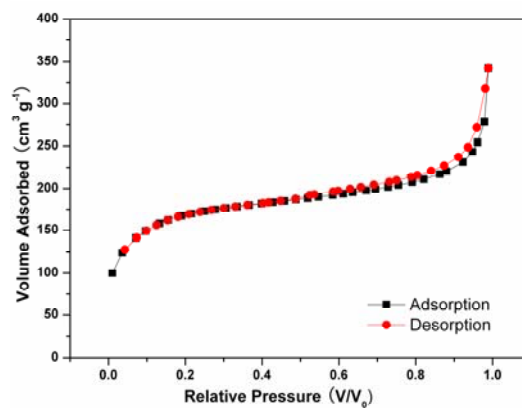

Figure S4. BET of the pure hollow mesoporous silica spheres.

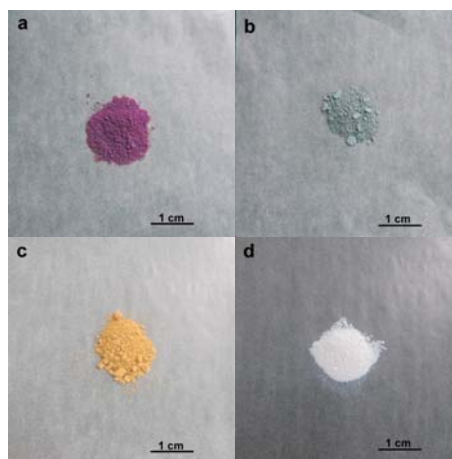

Figure S5. Photographs of (a) Au@SiO<sub>2</sub>, (b) Pt@SiO<sub>2</sub>, (c)  
Fe<sub>3</sub>O<sub>4</sub>@SiO<sub>2</sub> HMNS powders and (d) pure hollow mesoporous  
silica sphere powders.

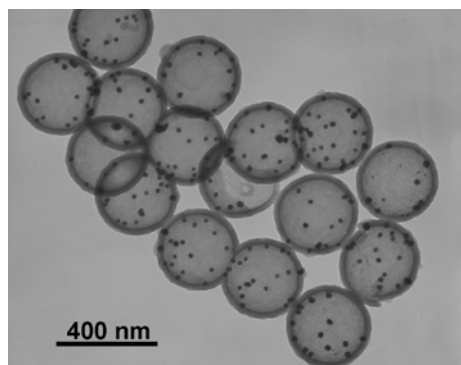

**Figure S6.** Typical TEM image of the Au@SiO<sub>2</sub> HMNSs after 8 cycles of catalysis.

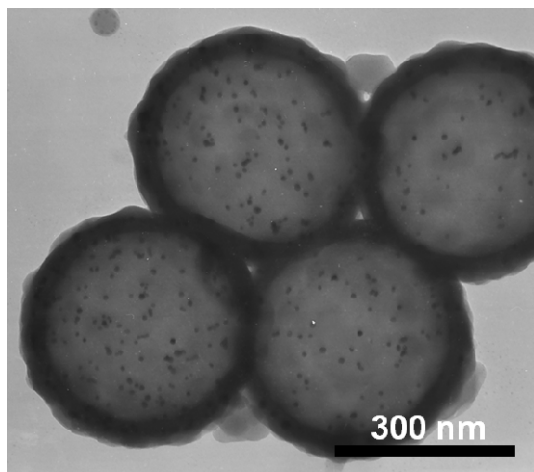

**Figure S7.** TEM image of Au@SiO<sub>2</sub> HMNSs with Au NPs of 4-5 nm.

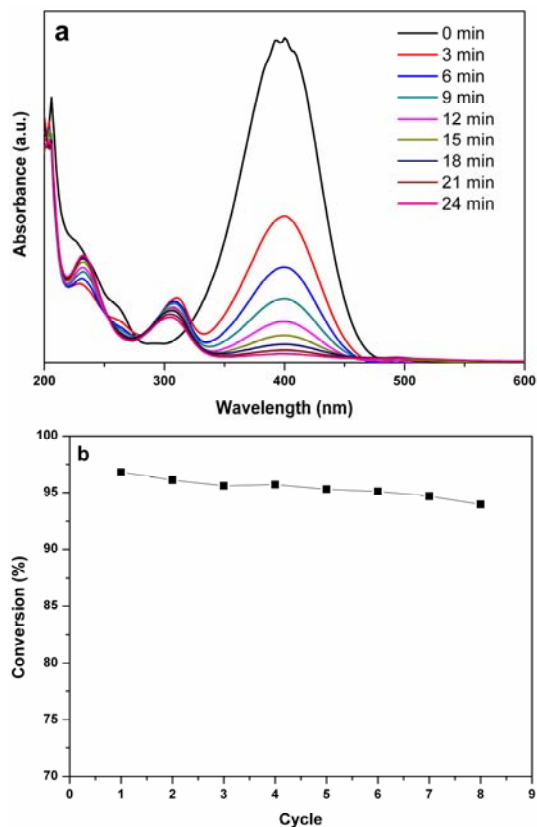

10

**Figure S8.** (a) Time-dependent UV-vis spectra of the solution catalyzed by Pt@SiO<sub>2</sub> HMNSs. (b) Reusability of Pt@SiO<sub>2</sub> HMNSs as catalysts for the reduction of 4-nitrophenol with NaBH<sub>4</sub>. 1 mg of Pt@SiO<sub>2</sub> composites spheres were used, containing Pt  $2.3 \times 10^{-7}$  mol. Other reaction conditions were the same with the process of Au@SiO<sub>2</sub> as catalysis.

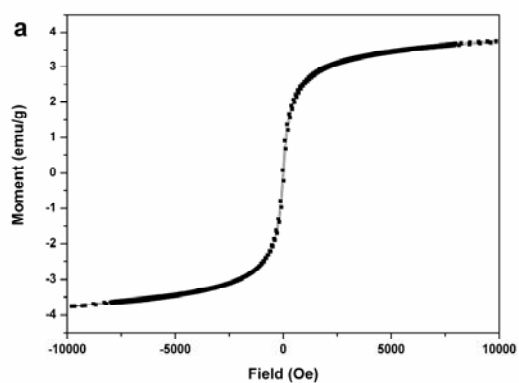

5

15

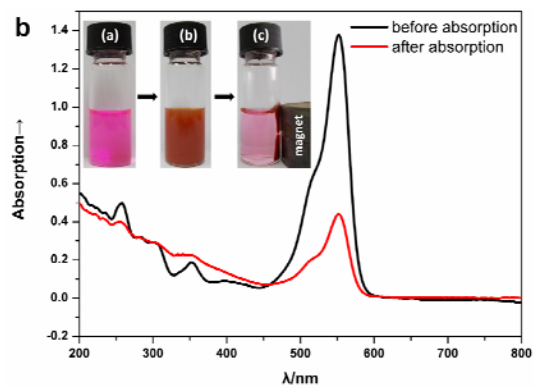

**Figure S9.** (a) The magnetic hysteresis loops of the  $\text{Fe}_3\text{O}_4@\text{SiO}_2$  HMNSs. (b) UV-vis absorption spectra of 10 mg/L Rhodamine solution before and after absorption by the  $\text{Fe}_3\text{O}_4@\text{SiO}_2$  HMNSs. Inset is the corresponding digital camera images: (a) 2 mL of 10 mg/L Rhodamine B solution, (b) mixture with 10 mg  $\text{Fe}_3\text{O}_4@\text{SiO}_2$  HMNSs, (c) magnetic separation of the  $\text{Fe}_3\text{O}_4@\text{SiO}_2$  HMNSs from the Rhodamine B solution under an external magnetic field.

10

15

20

25

30

35
